# Supplementary material for: Gut microbiota variation between climatic zones and due to migration strategy in passerine birds
Source: PubMed Central journal article supplement (PMC9928719; doi:10.3389/fmicb.2023.1080017), 2023-02-01

## *Supplementary Material*

### **Gut microbiota variation between climatic zones and due to migration strategy in passerine birds**

Schmiedová L<sup>1</sup>, Kreisinger J<sup>1,\*</sup>, Kubovčíak J<sup>1</sup>, Těšický M<sup>1</sup>, Martin JF<sup>3</sup>, Tomášek O<sup>1,2</sup>,  
Kauzálová T<sup>2</sup>, Sedláček O<sup>4</sup>, Albrecht T<sup>1,2</sup>

\* **Correspondence:** Corresponding Author: jakubkreisinger@seznam.cz

#### **1 Supplementary Figures**

**Supplementary Figure 1: Phylogenetic tree of species included in the study.** Geographic distribution and migration behaviour is indicated by different colours.

- tropical
- temperate (tran-Saharan)
- temperate (resid./short. dist.)

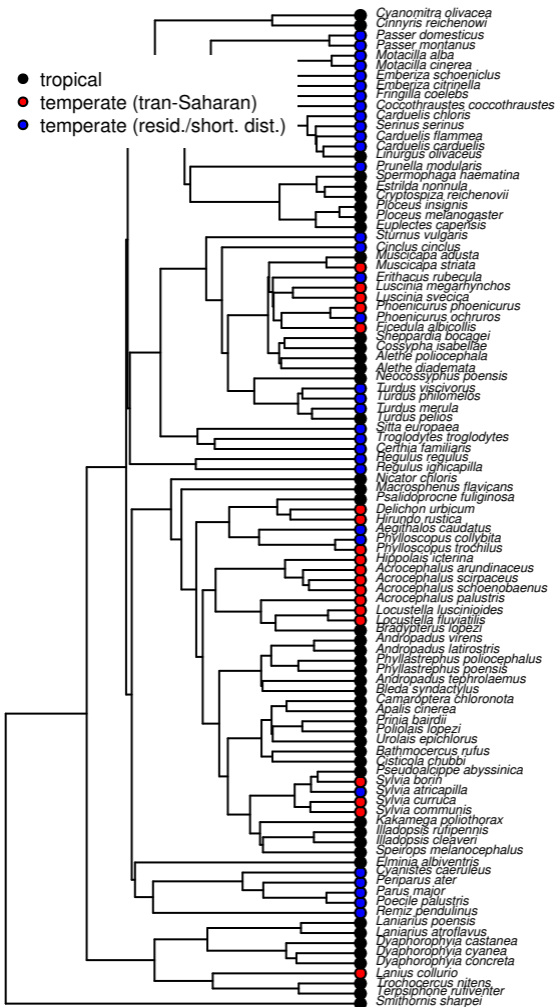

**Supplementary Figure 2: Association of GM alpha diversity with proportion of insects in diet.** Three alpha diversity measures were analysed, namely number of observed OTUs, phylogenetic diversity and Shannon diversity. Probability values based in Type II sum of squares associated with each alpha diversity measure are shown. Parameter estimates are presented in Supplementary Table 2.

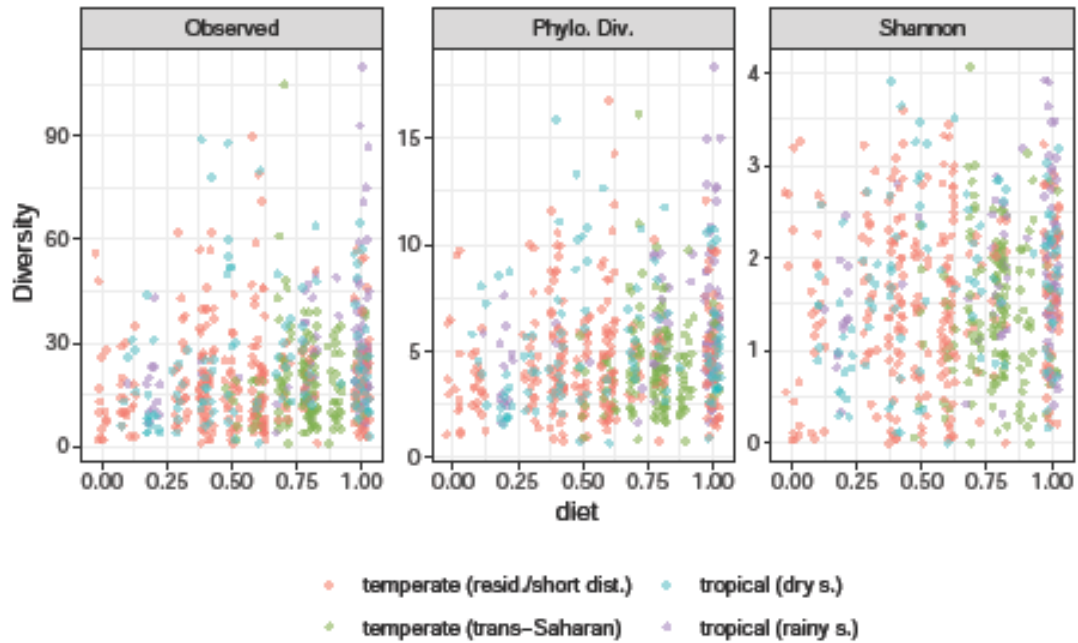

**Supplementary Figure 3: Variation in PCoA scores for first two ordination axes** between tropical passerines collected during dry or rainy season and trans-Saharan migrants or residents/short-distance migrants collected in temperate zone. Different letters above the bars indicate significant differences between the two host groups according to Tukey post hoc tests ( $p < 0.05$ ), whereas the presence of at least one common letter indicates a nonsignificant difference.

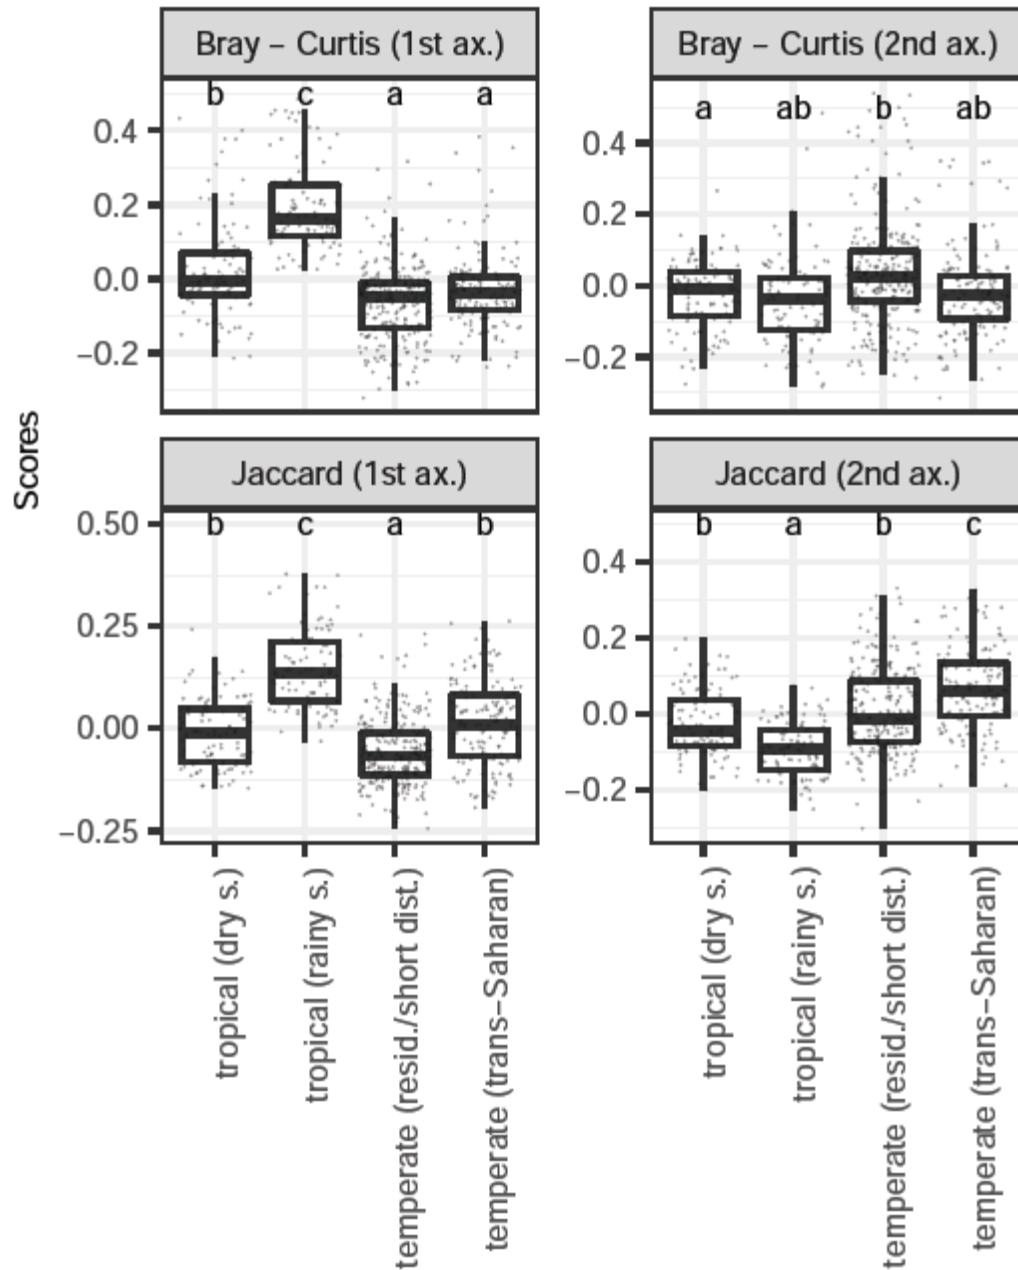

**Supplementary Figure 4: Association of GM composition (i.e. scores for the first two PCoA axes) with proportion of insects in diet.** PCoA was conducted for Bray-Curtis and Jaccard dissimilarities. Probability values based in Type II sum of squares associated with response measure are shown. Parameter estimates are presented in Supplementary Table 5.

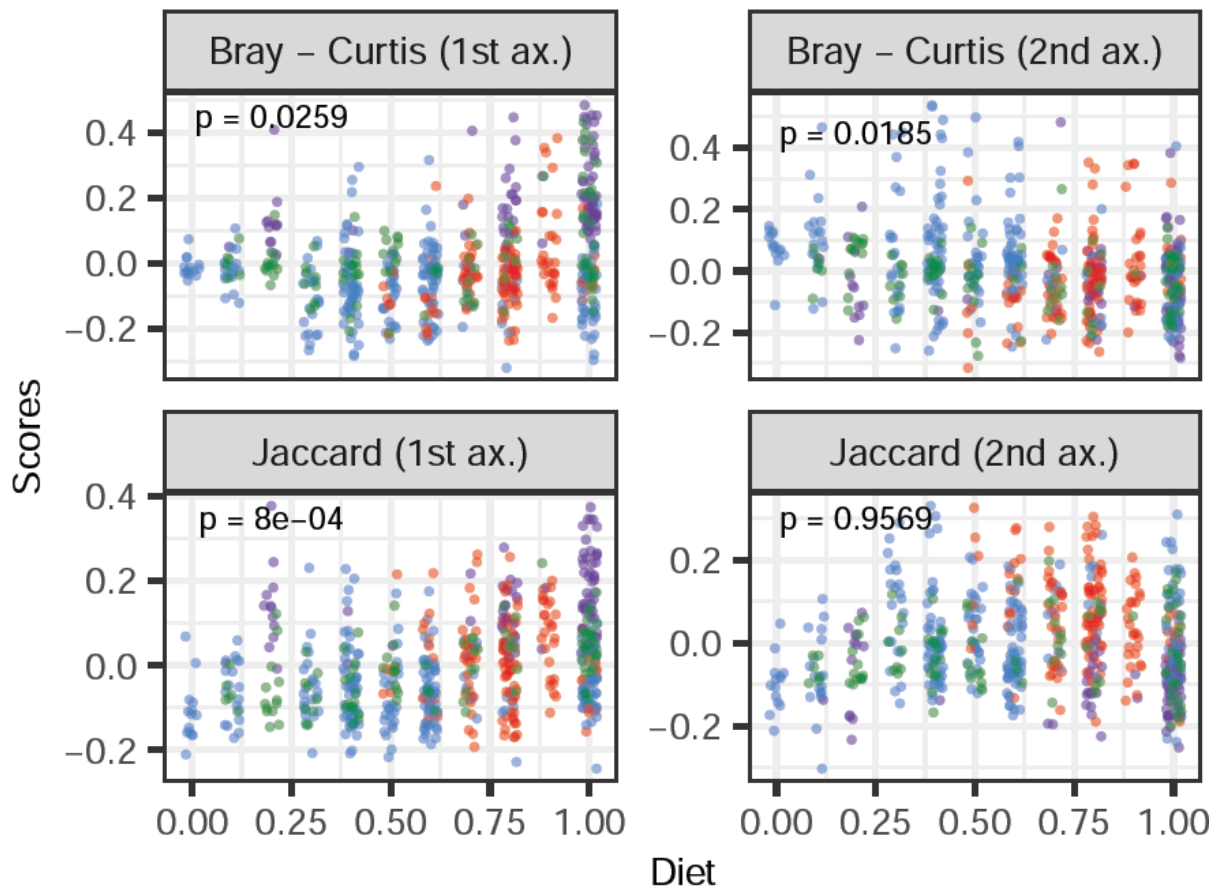

- temperate (resid./short dist.)
- temperate (trans-Saharan)
- tropical (dry s.)
- tropical (rainy s.)

**Supplementary Figure 5: Average difference in interspecific dissimilarities for species belonging to the same vs. the opposite category.** Error bars correspond to 95% bootstrap-based confidence intervals.

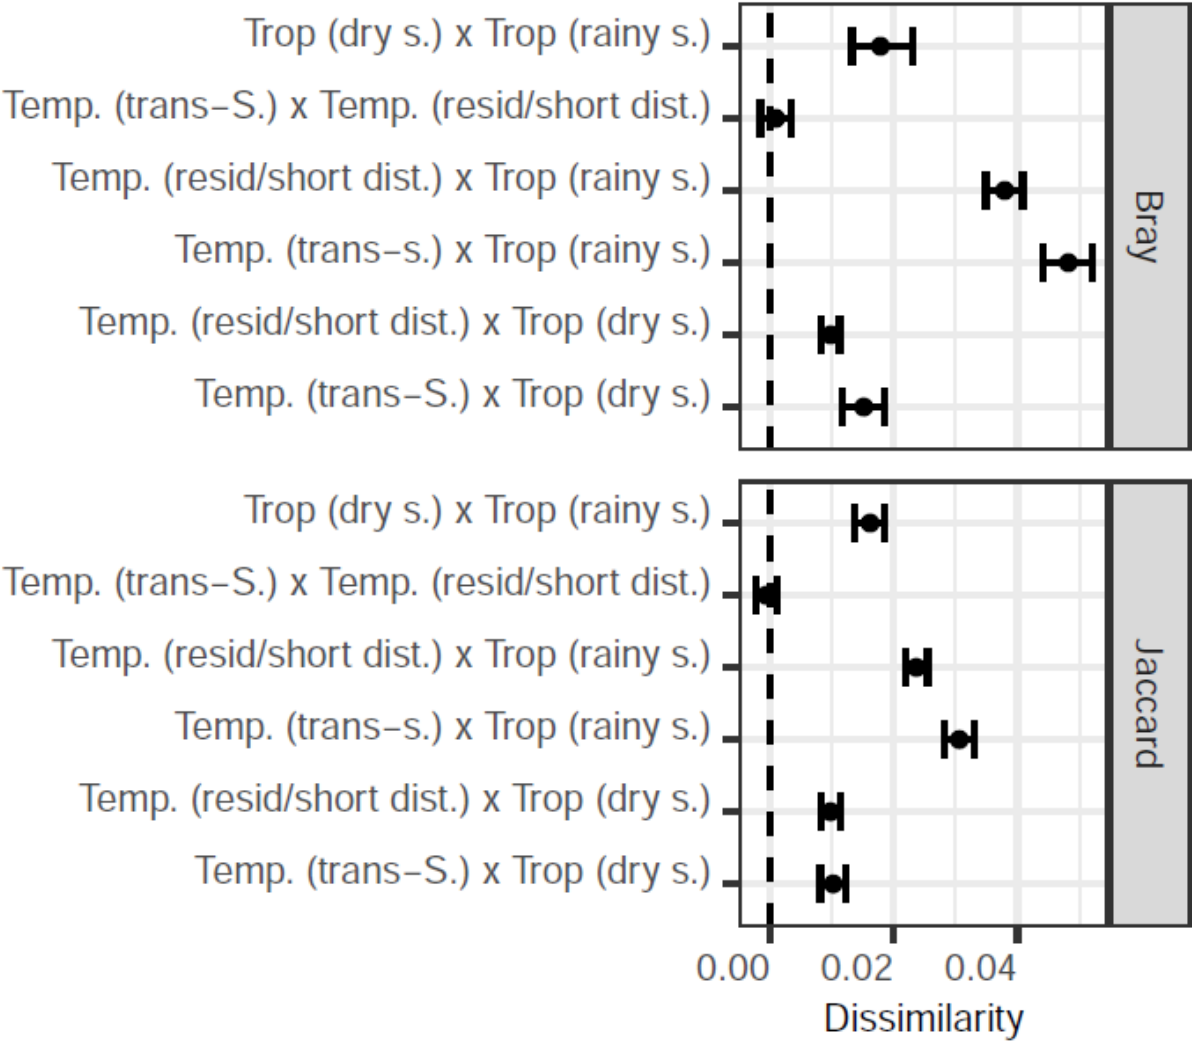

**Supplementary Figure 6: OTUs that exhibited significant variation between four categories** of passerine hosts according to GLMMs for data with negative binomial distribution. Only OTUs that passed multiple testing corrections ( $FDR < 0.05$ ) are shown. Different letters above the bars indicate significant differences between the two host groups according to Tukey post hoc tests ( $p < 0.05$ ), whereas the presence of at least one common letter indicates a nonsignificant difference.





**Supplementary Figure 7: OTUs that exhibited significant association with diet on a subset of tropical samples** according to GLMMs data with negative binomial distribution. Only OTUs that passed multiple testing corrections ( $FDR < 0.05$ ) are shown.

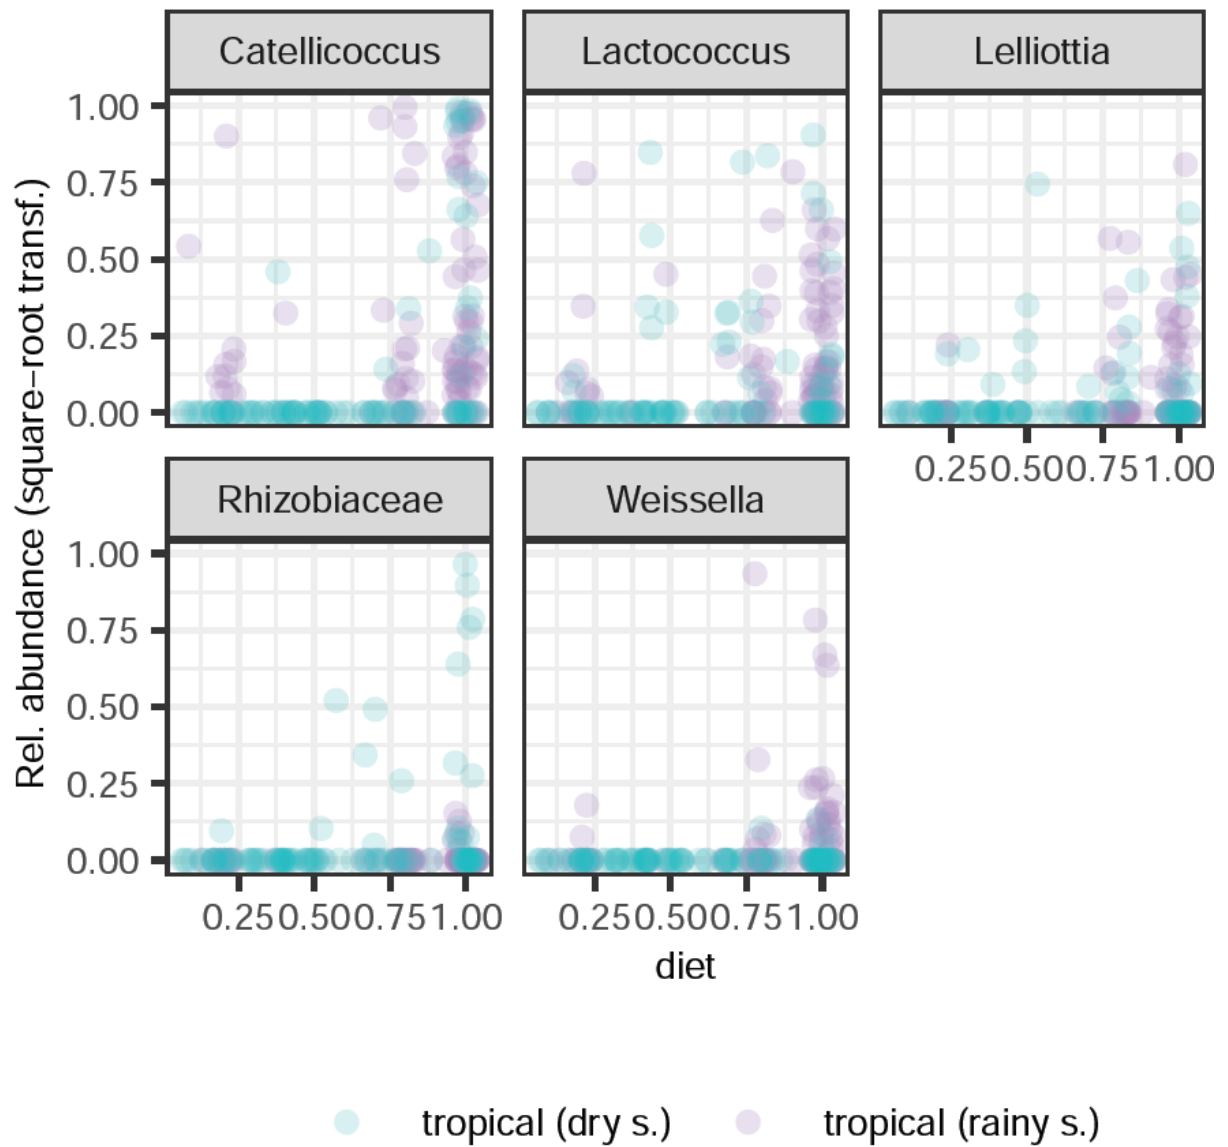

**Supplementary Figure 8: Alpha diversity variation between breeding vs. wintering grounds of two temperate trans-Saharan migrants (willow warbler - *Phylloscopus trochilus* and garden warbler - *Sylvia borin*).**

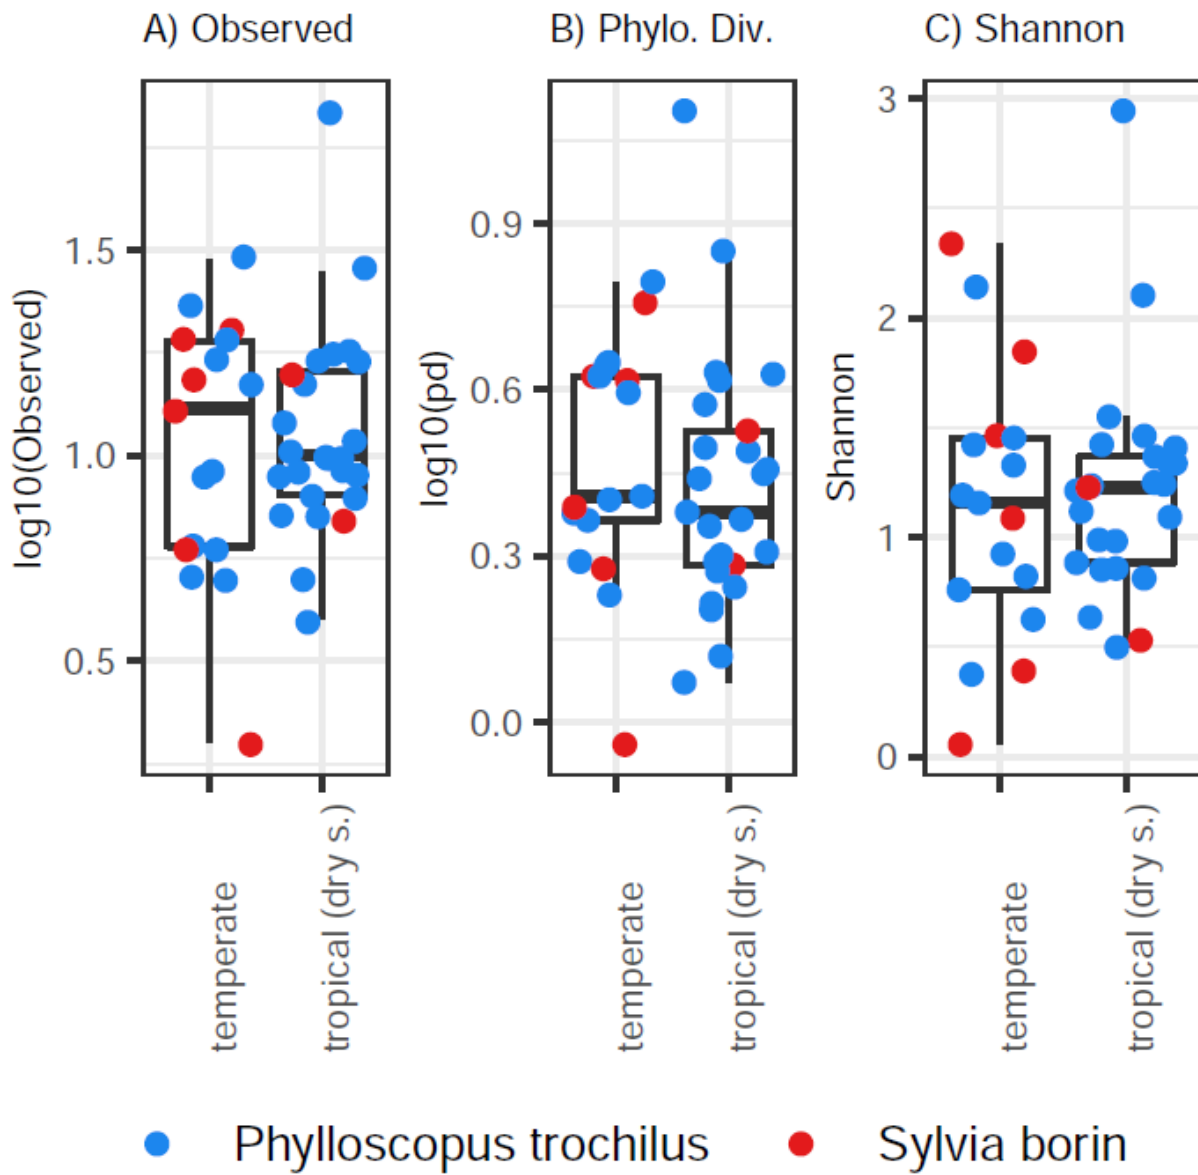

Supplement: Data_Sheet_1.pdf [file Data_Sheet_1.pdf]
